# Supplementary material for: The Impact of COVID-19-Related Stress on Diet and Eating Behaviors in US College Students: A Cross-Sectional Study
Source: Research Square preprint supplement (doi:10.21203/rs.3.rs-6196663/v1), 2025-03-14
Supplement: Supplementary file 1 [file b568a7914c5776aae748d6c9.docx]

# Supplementary materials

**Measures of Intake** (Sadler et al., 2021)

Dietary Intake was measured using an adapted version of the measures used by the Johns Hopkins University Appetite Lab (published later in Sadler et al., 2021). Students were asked to report the frequency of their consumption of Sweets (Sweet Snacks and Desserts), Savory Snacks (e.g., potato chips, corn chips, Chex Mix), Fruits, Vegetables, Fast Food (e.g., McDonald’s, Pizza Hut, KFC, Chipotle), and Sweetened Beverages (e.g., sweetened fruit drinks, sodas, sports drinks, energy drinks) in the past 7 days. Responses included Never/0 times per week, 1 time per week, 2 times per week, 3-4 times per week, 5-6 times per week, 1 time per day, 2-3 times per day, 4-5 times per day, or 6 or more times per day. These answers were recoded to reflect the number of servings consumed *per week*. Intake of Junk food in the past 7 days was created as a variable that sums the servings of sweets, savory snacks, fast foods, and sweetened beverages consumed in the past 7 days.

**Measures of Eating Behaviors**

*Perceived Change in Frequency of Eating*

To measure perceived change in frequency of eating from before the semester to the current mid-semester period, participants were asked, “In general, how do you think your frequency of eating has changed since before this semester started?” Responses included “I eat much less often than before (1),” “I eat somewhat less often than before (2),” “I eat slightly less often than before (3),” “I eat about the same number of times a day as before (4)”, “I eat slightly more often than before (5),” “I eat somewhat more often than before (6),” and “I eat much more often than before (7).” These responses were recoded into 3 levels of change which were “Eating less frequently (1-3),” “Same eating frequency (4),” and “Eating more frequently (5-7).”

*Perceived Change in Amount of Food*

To measure the perceived change in the amount of food consumed from before the semester to the current mid-semester period, participants were asked, “In general how do you think the amount of food you consume has changed from before this semester started?” Responses included “I eat a much smaller amount than before” (1),” “I eat a somewhat smaller amount than before” (2),” “I eat a slightly smaller amount than before (3),” “I eat about the same amount as before (4),” “I eat a slightly larger amount than before (5),” “I eat a somewhat larger amount than before (6),” and “I eat a much larger amount than before (7).” These responses were recoded into 3 levels of change which were “Eating less food (1-3),” “Eating about the same amount of food (4),” and “Eating more food (5-7).”

*Perceived Change in Health of Diet*

To measure the perceived change in the health of their diet from before the semester to the current mid-semester period, participants were asked “In general, how do you think the health of your diet has changed now compared to before the semester started?” Responses included: “I eat much less healthy than before (1),” “I eat somewhat less healthy than before (2),” “I eat slightly less healthy than before (3),” “I eat about the same healthiness as before (4),” “I eat slightly healthier than before (5),” “I eat somewhat healthier than before (6),” and “I eat much healthier than before (7).” These responses were recoded into 3 levels of change which were “Eating less healthily (1-3),” “Eating equally healthy (4),” and “Eating more healthily (5-7).”

*Late-Night Eating*

To assess the frequency of late-night eating, participants were asked to answer the question, “How much of your daily food intake did you consume after dinner?” as applying to the past 7 days. Responses included “0% (none) (1),” “1-25% (up to a quarter) (2),” “26-50% (up to a half) (3),” “51-75% (more than half) (4),” and “76-100% (almost all) (5).” These responses were recoded into 3 quantitative levels which were “Less than Half of Diet Consumed After Dinner (1-2),” “About Half of Diet Consumed After Dinner (3),” and “More than Half of Diet Consumed After Dinner (4-5).”

**Adult Eating Behavior Questionnaire (AEBQ)** (Hunot et al., 2016)

The Adult Eating Behavior Questionnaire (AEBQ) is a 35-item questionnaire that measures adult eating behaviors using several subscales focused on Food Approach and Food Avoidance (Cohen et al., 2021; Hunot et al., 2016). Four subscales from the Adult Eating Behavior Questionnaire (AEBQ) were included to capture Food responsiveness, Satiety Response, Emotional Overeating, and Emotional Undereating experienced by the population. To calculate these scores, participants were given 18 statements about their eating patterns and using a traditional 5-point Likert scale (Strongly Disagree, Disagree, Neither Agree or Disagree, Agree, Strongly Agree) responded to the question “To what extent do you agree or disagree with the following statements?” Some sample statements included “I often feel hungry when I am with someone who is eating”; “I am always thinking about food”; “I eat more when I’m upset”; and “I often leave food on my plate at the end of a meal.” Averages of responses to questions in each of the four behaviors were used to calculate individual Food responsiveness, Satiety Response, Emotional Overeating, and Emotional Undereating mean scores.

**Revised Emotional Eating Scale with Boredom and Emotions Experienced** (Koball et al., 2012)

In an adaptation of the “Revision of the Emotional Eating Scale with a Focus on Boredom” presented in the 2012 Koball et al. paper, participants were given two questions evaluating emotions they have experienced and the urge to eat associated with these emotions. To measure emotions experienced, they were asked “Thinking back over the past 7 days, please indicate the extent to which you have experienced either of the following emotions.” Four emotional states were then listed (“Blah, bored, nothing to do, restless, or unmotivated”; “Sad, worried, lonely, helpless, or depressed”; “On edge, irritable, nervous, anxious, or frustrated”; “Stressed”) and participants rated the frequency of each these emotional states (1= Never, 2= Rarely, 3= Sometimes, 4= Often, and 5= Very Often). Emotional eating was evaluated using the question “Please indicate the extent to which the following feelings led you to feel an urge to eat over the past 7 days.” The same four emotional states were listed as options, and they rated the frequency of eating due to these emotions using the same response options. To generate an Emotions Experienced score, an average rating for the four emotional states was calculated. For Emotional Eating, similarly, an average rating for the four emotional eating states was calculated. The latter number (Emotional Eating Average) became the “REES B emotional eating score” used to evaluate emotional eating behaviors. This number was interpreted with 1 being the lowest potential score to indicate no emotional eating and 5 being the highest potential score to indicate very frequent emotional eating.

**4-item** **Perceived Stress Scale Measure (PSS-4)** (Herrero & Meneses, 2006)

In a shorter version of the traditional 10-item Perceived Stress Scale (PSS-4), participants were asked 4 questions to explore their stress levels and asked to answer these based on perception of the last month and before the Fall 2020 semester respectively. These questions included: “How often have you felt that you were unable to control the important things in your life?”; “How often have you felt confident about your ability to handle your personal problems?”; “How often have you felt that things were going your way?”; and “How often have you felt difficulties were piling up so high that you could not overcome them?” Participants reported the frequency of these experiences and emotions on a scale of Never, Almost Never, Sometimes, Fairly Often, and Very Often. Where necessary, items were reverse coded before the mean Perceived Stress Score (PSS) was calculated.

**Center of Epidemiologic Studies Depression Scale (CES-D-10)** (Andresen et al., 1994)

The Center of Epidemiologic Studies Depression Scale (CES-D-10) was included in the survey to assess depression (Andresen et al., 1994). Participants were asked “Please indicate how often you have felt this way during the past week by selecting the appropriate choice for each question” and given 10 statements related to experiencing depressive symptoms (e.g., “I was bothered by things that don’t usually bother me”; “I felt depressed”) and asked to report the frequency of these symptoms using the options “Rarely or none of the time (less than 1 day),” “Some or a little of the time (1-2 days),” “Occasionally or a Moderate amount of time (3-4 days), “Most or All of the time (5-7 days).” Following reverse coding where necessary, item responses were summed to derive the CES-D-10 score.

**Perceived Social Support Questionnaire** (Lin et al., 2019)

As part of the survey, participants were given the Perceived Support Questionnaire (Lin et al., 2019) to assess their perceived social support. This tool consists of 6 statements that describe experiencing the presence of social security, social safety, and a personal community of support and participants rank the extent to which they agree with each statement using a traditional 5-point Likert scale (1= Strongly Disagree, 2= Disagree, 3= Neither agree nor disagree, 4= Agree, 5= Strongly agree). For example, the measure asks individuals to agree or disagree with statements of social support like “I receive a lot of understanding and security from others” and “There is someone very close to me whose help I can always count on.” Item responses were summed to generate an overall Perceived Social Support Score.
